# Supplementary material
Source: PubMed Central journal article supplement (PMC2714722)
Supplement: ddp231_1.pdf [file ddp231_1.pdf]

**Supplementary Figure 1. Three major linkage disequilibrium bins across the *CHRNA5-CHRNA3-CHRNA4* gene cluster.** These bins are defined by pair-wise linkage disequilibrium with  $r^2 \geq 0.8$  among polymorphisms in subjects of European origin. Arrows indicate representative variant in each bin.

**Supplementary Figure 2. Minor allele of rs3841324 is associated with increased mRNA expression of *CHRNA5* in human frontal cortex ( $p=1.11 \times 10^{-9}$ )**

The bars represent mean  $\pm$  SD of *CHRNA5* mRNA expression.

**Supplementary Figure 3. Minor allele of rs16969968 is weakly associated with increased mRNA expression of *CHRNA5* in human frontal cortex ( $p=1.26 \times 10^{-2}$ )**

The bars represent mean  $\pm$  SD of *CHRNA5* mRNA expression.

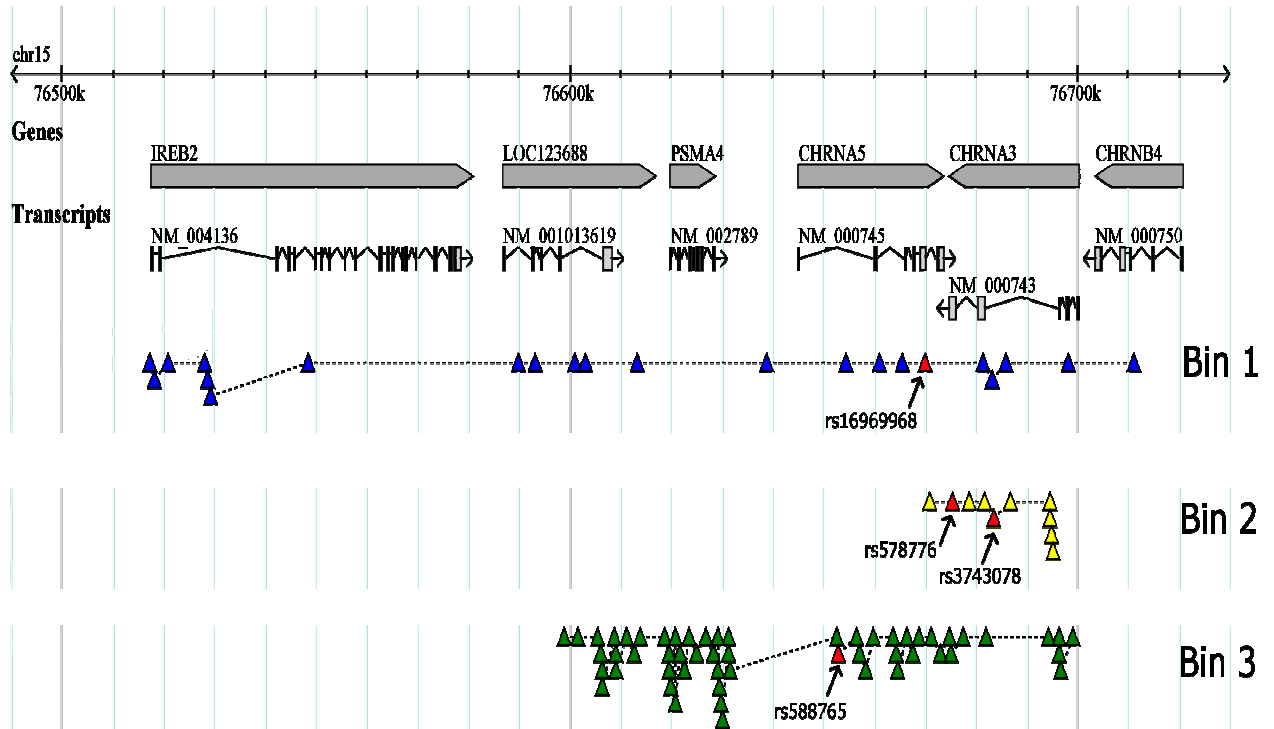

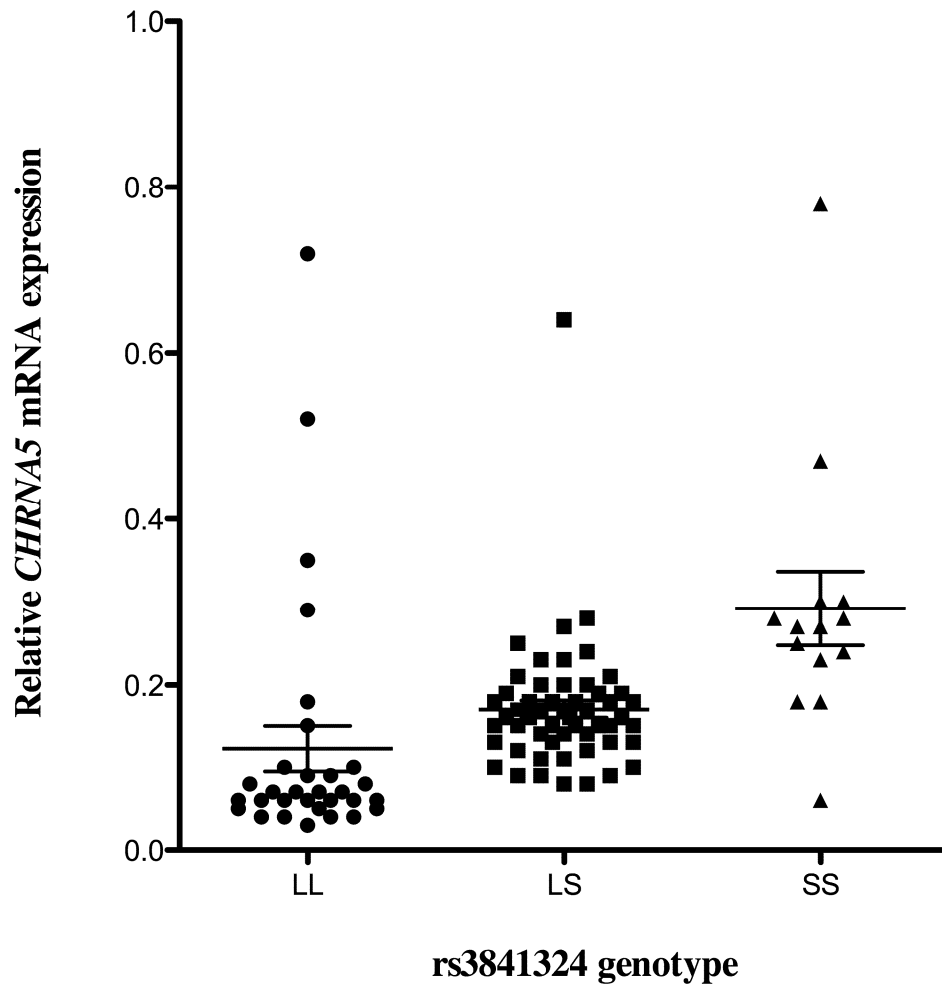

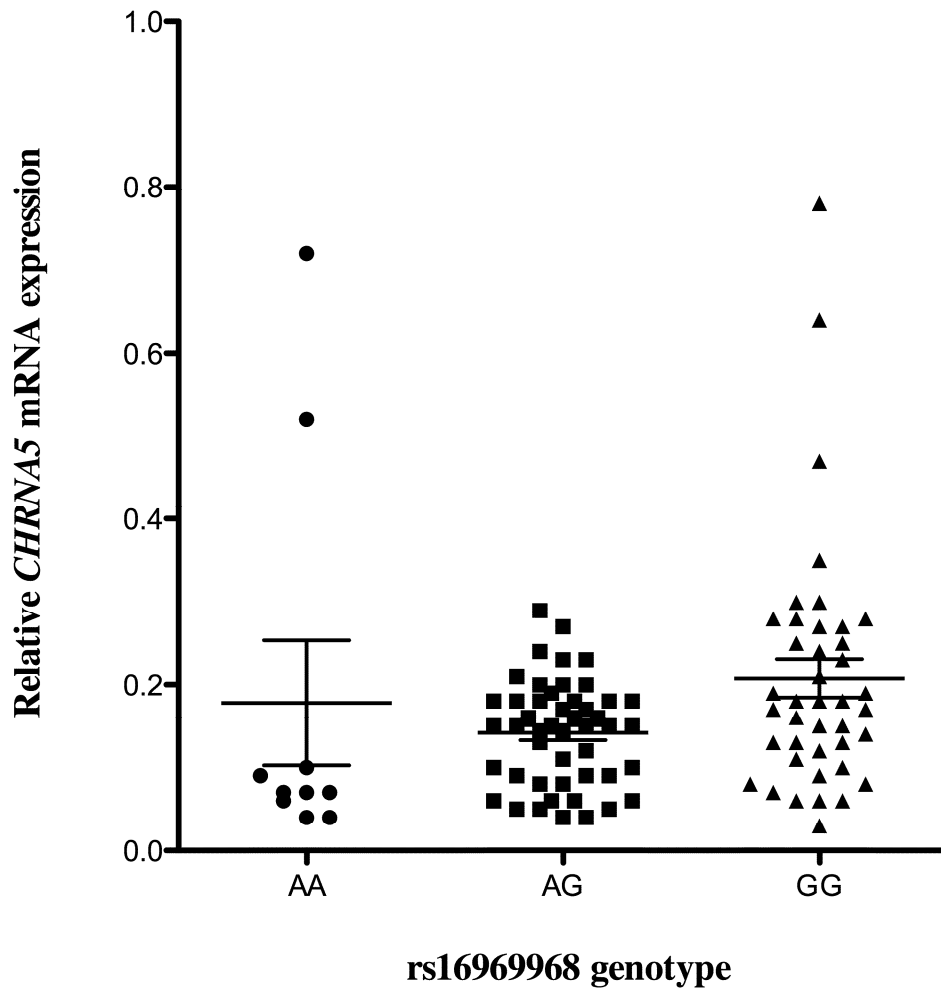

**Supplementary Table 1. The effect of covariates on *CHRNA5*, *CHRNA3*, and *CHRNA4* mRNA expression.**

Each cell indicates the p values.

| Covariate           | log(A5) | log(A3)  | log(B4) |
|---------------------|---------|----------|---------|
| Postmortem Interval | 0.02    | 0.43     | 0.28    |
| Age                 | 0.40    | 1.76E-07 | 0.29    |
| Sex                 | 0.57    | 0.03     | 0.01    |
| Site of Brain Bank  | 0.09    | 2.81E-06 | 0.04    |
| Smoking history     | 0.82    | 0.26     | 0.03    |

**Supplemental Table 2. Association of *CHRNA3* and *CHRNA4* mRNA expression in human brain with variants in the *CHRNA5-CHRNA3-CHRNA4* gene cluster.** The data shown here are from a linear regression. Blue, yellow and green colors represent highly correlated ( $r^2 \geq 0.6$ ) variants in bins 1, 2, and 3, respectively. MAF=minor allele frequency. \*indicates a synonymous coding SNP; \*\*indicates a non-synonymous coding SNP.

| Variant      | Gene                                            | Allele 1<br>(Minor)                             | Allele 2<br>(Major) | Minor<br>allele<br>frequency | <i>CHRNA3</i> |                           |                               |             | <i>CHRNA4</i> |                           |                               |             |      |
|--------------|-------------------------------------------------|-------------------------------------------------|---------------------|------------------------------|---------------|---------------------------|-------------------------------|-------------|---------------|---------------------------|-------------------------------|-------------|------|
|              |                                                 |                                                 |                     |                              | N             | Regression<br>coefficient | 95%<br>Confidence<br>interval | P<br>value  | N             | Regression<br>coefficient | 95%<br>Confidence<br>interval | P value     |      |
| rs880395     | <i>upstream of<br/>CHRNA5<br/>transcription</i> | A                                               | G                   | 0.44                         | 94            | -0.22                     | -0.47, 0.02                   | 0.08        | 73            | -0.16                     | -0.37, 0.05                   | 0.13        |      |
| rs7164030    |                                                 | G                                               | A                   | 0.46                         | 90            | -0.26                     | -0.50, -0.01                  | 0.05        | 69            | -0.13                     | -0.34, 0.08                   | 0.24        |      |
| rs905739     |                                                 | G                                               | A                   | 0.24                         | 93            | 0.30                      | 0.02, 0.58                    | 0.04        | 72            | 0.10                      | -0.15, 0.35                   | 0.43        |      |
| rs2036527    |                                                 | A                                               | G                   | 0.33                         | 93            | -0.01                     | -0.28, 0.26                   | 0.92        | 72            | 0.17                      | -0.06, 0.40                   | 0.16        |      |
| rs3841324    |                                                 | S                                               | L                   | 0.41                         | 94            | -0.22                     | -0.48, 0.04                   | 0.11        | 73            | -0.14                     | -0.36, 0.08                   | 0.22        |      |
| rs684513     | <i>CHRNA5</i>                                   | G                                               | C                   | 0.22                         | 90            | 0.31                      | 0.01, 0.60                    | 0.05        | 69            | 0.04                      | -0.22, 0.30                   | 0.77        |      |
| rs667282     |                                                 | C                                               | T                   | 0.25                         | 93            | 0.30                      | 0.03, 0.57                    | 0.03        | 72            | 0.06                      | -0.17, 0.30                   | 0.59        |      |
| rs588765     |                                                 | T                                               | C                   | 0.42                         | 93            | -0.24                     | -0.48, 0.01                   | 0.06        | 72            | -0.19                     | -0.40, 0.01                   | 0.06        |      |
| rs17486278   |                                                 | C                                               | A                   | 0.33                         | 93            | 0.01                      | -0.26, 0.28                   | 0.92        | 72            | 0.19                      | -0.04, 0.42                   | 0.11        |      |
| rs601079     |                                                 | A                                               | T                   | 0.45                         | 91            | -0.26                     | -0.51, -0.02                  | 0.04        | 71            | -0.20                     | -0.41, 0.01                   | 0.07        |      |
| rs680244     |                                                 | T                                               | C                   | 0.4                          | 88            | -0.29                     | -0.55, -0.03                  | 0.03        | 68            | -0.16                     | -0.37, 0.06                   | 0.15        |      |
| rs621849     |                                                 | G                                               | A                   | 0.41                         | 89            | -0.30                     | -0.55, -0.05                  | 0.02        | 68            | -0.17                     | -0.38, 0.04                   | 0.12        |      |
| rs569207     |                                                 | T                                               | C                   | 0.23                         | 93            | 0.31                      | 0.03, 0.58                    | 0.03        | 72            | 0.06                      | -0.18, 0.29                   | 0.65        |      |
| rs637137     |                                                 | A                                               | T                   | 0.23                         | 93            | 0.30                      | 0.03, 0.58                    | 0.03        | 72            | 0.08                      | -0.16, 0.31                   | 0.53        |      |
| rs692780     |                                                 | G                                               | C                   | 0.35                         | 93            | -0.26                     | -0.50, -0.02                  | 0.04        | 72            | -0.24                     | -0.44, -0.04                  | 0.02        |      |
| rs11637635   |                                                 | A                                               | G                   | 0.32                         | 86            | -0.28                     | -0.54, -0.02                  | 0.04        | 65            | -0.24                     | -0.46, -0.01                  | 0.04        |      |
| rs951266     |                                                 | A                                               | G                   | 0.34                         | 93            | 0.00                      | -0.26, 0.26                   | 1.00        | 72            | 0.17                      | -0.05, 0.40                   | 0.13        |      |
| rs555018     |                                                 | G                                               | A                   | 0.41                         | 91            | -0.26                     | -0.51, -0.02                  | 0.04        | 70            | -0.14                     | -0.34, 0.06                   | 0.16        |      |
| rs16969968** |                                                 | A                                               | G                   | 0.36                         | 93            | 0.01                      | -0.25, 0.28                   | 0.92        | 72            | 0.19                      | -0.04, 0.42                   | 0.11        |      |
| rs514743     |                                                 | T                                               | A                   | 0.34                         | 93            | -0.24                     | -0.48, 0.00                   | 0.06        | 72            | -0.27                     | -0.47, -0.07                  | 0.01        |      |
| rs615470     |                                                 | T                                               | C                   | 0.32                         | 82            | -0.27                     | -0.54, 0.00                   | 0.05        | 64            | -0.28                     | -0.51, -0.06                  | 0.01        |      |
| rs578776     |                                                 | <i>CHRNA3</i>                                   | A                   | G                            | 0.29          | 92                        | 0.28                          | 0.02, 0.55  | 0.04          | 71                        | 0.13                          | -0.09, 0.35 | 0.26 |
| rs12910984   |                                                 |                                                 | G                   | A                            | 0.26          | 91                        | 0.30                          | 0.04, 0.57  | 0.03          | 70                        | 0.01                          | -0.21, 0.24 | 0.91 |
| rs1051730*   |                                                 |                                                 | A                   | G                            | 0.32          | 92                        | 0.01                          | -0.26, 0.28 | 0.94          | 71                        | 0.19                          | -0.04, 0.42 | 0.11 |
| rs3743078    |                                                 |                                                 | G                   | C                            | 0.24          | 91                        | 0.31                          | 0.03, 0.58  | 0.03          | 71                        | 0.05                          | -0.19, 0.29 | 0.66 |
| rs1317286    | G                                               |                                                 | A                   | 0.33                         | 84            | 0.03                      | -0.25, 0.31                   | 0.84        | 65            | 0.18                      | -0.06, 0.42                   | 0.14        |      |
| rs938682     | G                                               |                                                 | A                   | 0.26                         | 91            | 0.31                      | 0.04, 0.58                    | 0.03        | 70            | 0.03                      | -0.21, 0.27                   | 0.78        |      |
| rs11637630   | G                                               |                                                 | A                   | 0.23                         | 92            | 0.30                      | 0.03, 0.58                    | 0.03        | 71            | 0.08                      | -0.16, 0.31                   | 0.53        |      |
| rs6495308    | C                                               |                                                 | T                   | 0.24                         | 93            | 0.32                      | 0.05, 0.59                    | 0.02        | 72            | 0.06                      | -0.18, 0.30                   | 0.63        |      |
| rs8192479    | T                                               |                                                 | C                   | 0.01                         | 91            | 0.70                      | -0.25, 1.66                   | 0.15        | 70            | 1.19                      | -0.01, 2.39                   | 0.06        |      |
| rs3743075*   | T                                               |                                                 | C                   | 0.33                         | 93            | -0.24                     | -0.48, 0.00                   | 0.06        | 72            | -0.27                     | -0.46, -0.07                  | 0.01        |      |
| rs3743074    | G                                               |                                                 | A                   | 0.35                         | 90            | -0.26                     | -0.51, -0.02                  | 0.03        | 69            | -0.22                     | -0.42, -0.02                  | 0.04        |      |
| rs8040868*   | C                                               |                                                 | T                   | 0.4                          | 93            | 0.00                      | -0.25, 0.25                   | 0.98        | 72            | 0.25                      | 0.04, 0.47                    | 0.03        |      |
| rs8192475**  | T                                               |                                                 | C                   | 0.08                         | 94            | -0.02                     | -0.57, 0.53                   | 0.94        | 73            | 0.35                      | -0.09, 0.79                   | 0.13        |      |
| rs1878399    | G                                               |                                                 | C                   | 0.44                         | 93            | -0.24                     | -0.48, 0.01                   | 0.06        | 72            | -0.21                     | -0.42, -0.01                  | 0.05        |      |
| rs12914008** | <i>CHRNA4</i>                                   |                                                 | A                   | G                            | 0.06          | 93                        | -0.08                         | -0.69, 0.52 | 0.79          | 72                        | 0.46                          | -0.03, 0.95 | 0.07 |
| rs17487223   |                                                 | T                                               | C                   | 0.34                         | 92            | 0.02                      | -0.24, 0.28                   | 0.87        | 71            | 0.21                      | 0.00, 0.42                    | 0.05        |      |
| rs950776     |                                                 | C                                               | T                   | 0.35                         | 93            | -0.21                     | -0.47, 0.05                   | 0.11        | 72            | -0.34                     | -0.55, -0.13                  | 0.00        |      |
| rs12440014   |                                                 | G                                               | C                   | 0.26                         | 92            | 0.27                      | 0.00, 0.55                    | 0.05        | 71            | 0.04                      | -0.21, 0.29                   | 0.77        |      |
| rs11636605   |                                                 | A                                               | G                   | 0.23                         | 94            | 0.28                      | 0.00, 0.56                    | 0.05        | 73            | -0.01                     | -0.27, 0.24                   | 0.91        |      |
| rs3813567    |                                                 | G                                               | A                   | 0.21                         | 93            | 0.30                      | 0.00, 0.59                    | 0.05        | 72            | 0.00                      | -0.25, 0.26                   | 0.97        |      |
| rs4887075    |                                                 | <i>upstream of<br/>CHRNA4<br/>transcription</i> | C                   | T                            | 0.06          | 92                        | -0.08                         | -0.60, 0.43 | 0.76          | 71                        | -0.15                         | -0.58, 0.28 | 0.49 |
| rs1996371    |                                                 | C                                               | T                   | 0.41                         | 94            | 0.03                      | -0.21, 0.27                   | 0.82        | 73            | 0.29                      | 0.09, 0.49                    | 0.01        |      |
| rs16970006   | C                                               | T                                               | 0.07                | 91                           | 0.01          | -0.52, 0.53               | 0.98                          | 70          | -0.19         | -0.65, 0.27               | 0.41                          |             |      |

**Supplementary Table 3. *CHRNA5* mRNA expression (normalized with endogenous *GAPDH* gene) of different rs16969968-rs588765 diplotype.**

The mean expression is calculated without outliers.

|                   |               | <b>rs588765</b> |               |               |               |               |
|-------------------|---------------|-----------------|---------------|---------------|---------------|---------------|
|                   |               | <b>CC</b>       |               | <b>CT</b>     |               | <b>TT</b>     |
| <b>rs16969968</b> | # of subjects | Mean (Std.D)    | # of subjects | Mean (Std.D)  | # of subjects | Mean (Std.D)  |
| GG                | 5             | 0.074 (0.045)   | 17            | 0.139 (0.044) | 16            | 0.251 (0.083) |
| AG                | 16            | 0.086 (0.045)   | 31            | 0.166 (0.047) |               |               |
| AA                | 8             | 0.068 (0.021)   |               |               |               |               |
